# Supplementary material
Source: publisher figshare collection journal article supplement (https://acs.figshare.com/ndownloader/files/4091668)
Supplement: Supplementary file 1 [file 4091668]

# Supporting Information

**Use of deuterated camphor as substrate in  $^1\text{H}$  ENDOR studies of hydroxylation by cryoreduced oxy P450cam provides new evidence for the involvement of compound I**

Roman Davydov, John H. Dawson, Roshan Perera\*, and Brian M. Hoffman\*

(A)

C:\GCMSsolution\Data\RP\Ketocamphor.qgd

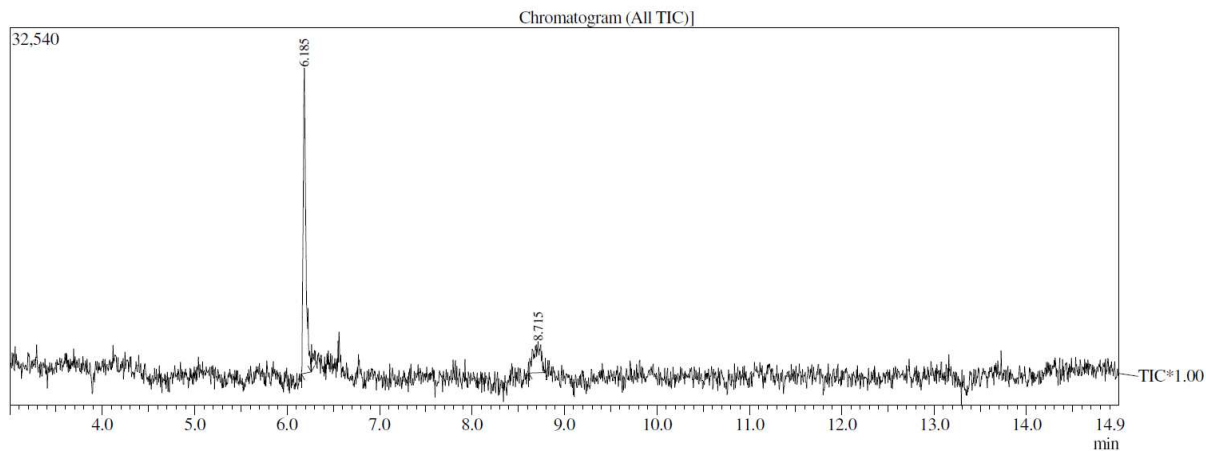

(B)

Line#:1 R.Time:6.185(Scan#:638)  
MassPeaks:105  
RawMode:Averaged 6.180-6.190(637-639) BasePeak:69.10(2541)  
BG Mode:Calc. from Peak Group 1 - Event 1

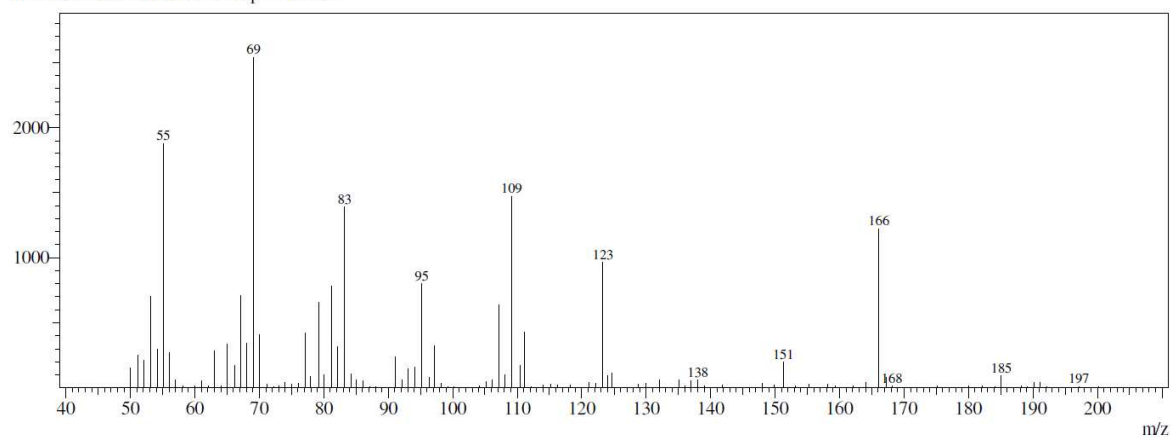

(C)

Hit# 2 Entry: 23101 Library: NIST08.LIB

SE: 71 Formula: C<sub>10</sub>H<sub>14</sub>O<sub>2</sub> CAS: 4230-32-4 MolWeight: 166 RetIndex: 1292

CompName: Bicyclo[2.2.1]heptane-2,5-dione, 1,7,7-trimethyl- SS 2,5-Bornanedione SS 1,7,7-Trimethylbicyclo[2.2.1]heptane-2,5-dione # SS

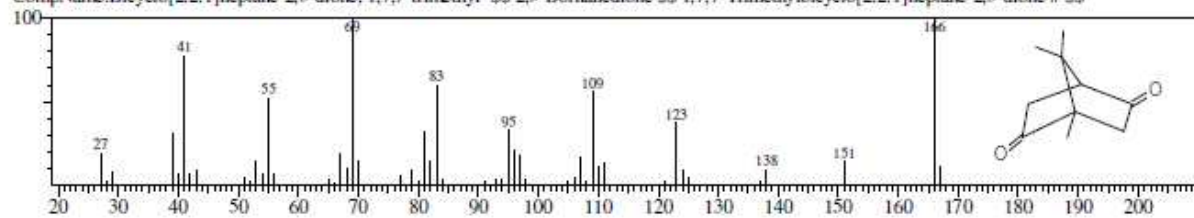

(D)

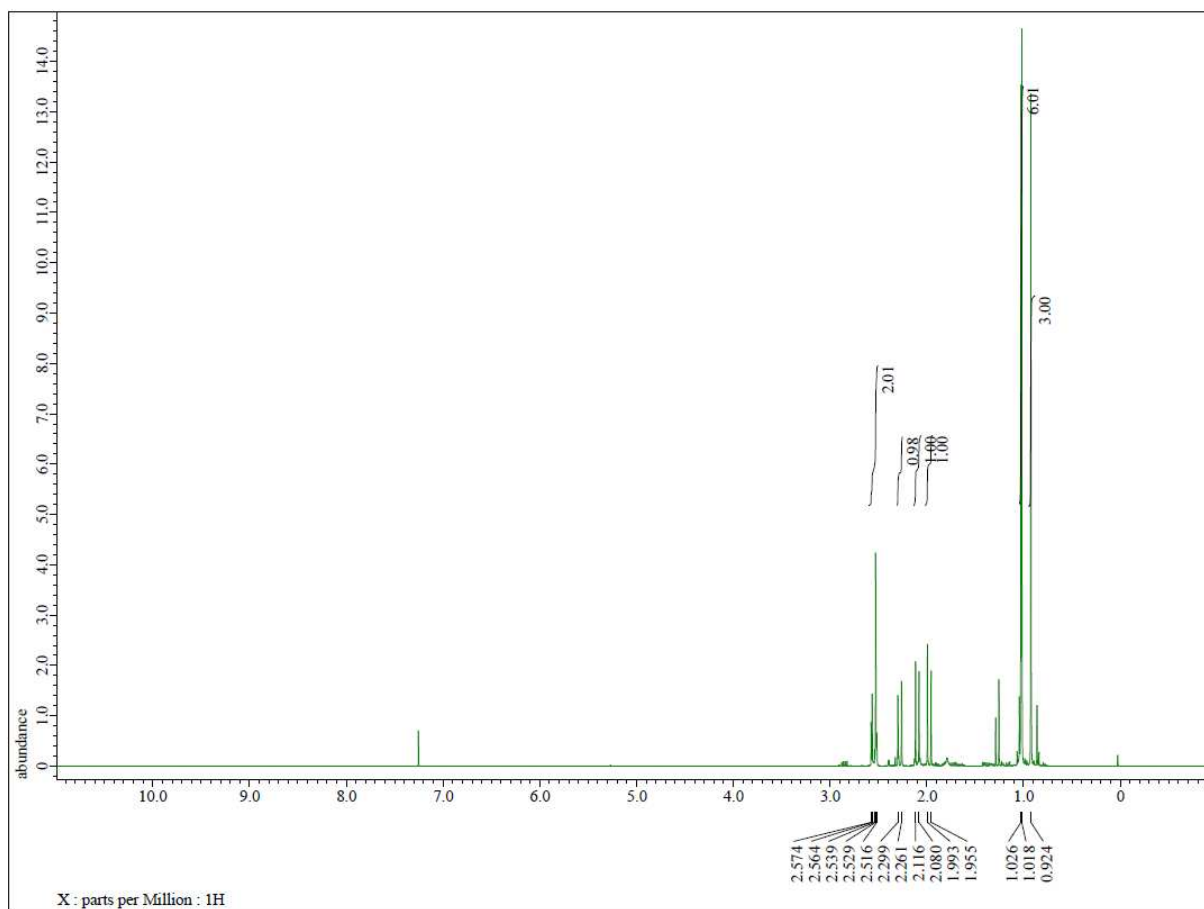

**(E)**

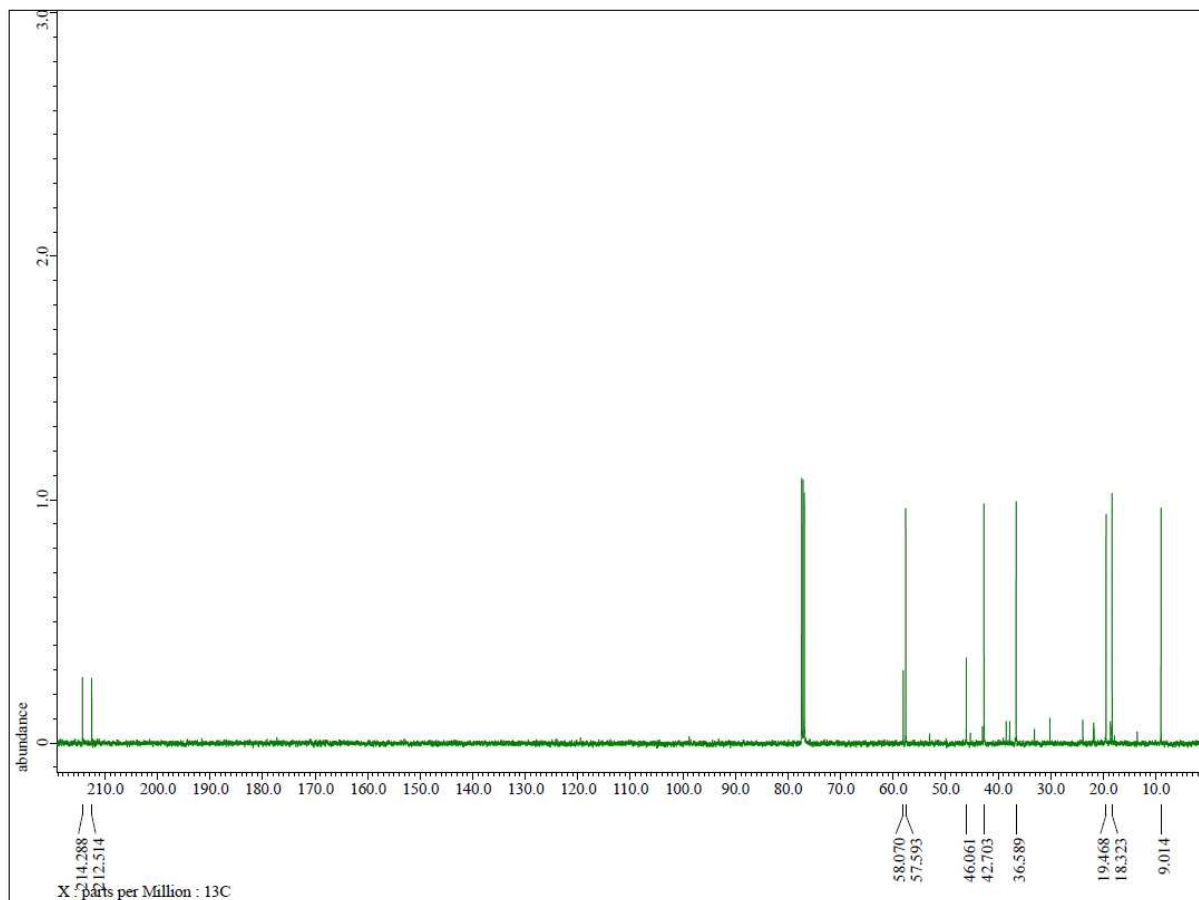

**Supporting Information Figure S1:** Gas-chromatography (GC), MS and NMR (recorded on a Jeol Eclipse 500 MHz spectrometer at UT-Arlington) data for 5-ketocamphor (5-oxo-1*R* (+)-camphor). **A**, GC data; **B**, mass spectrum; and **C**, compound library search of 5-ketocamphor gave an exact match. **D** and **E** represent the  $^1\text{H}$  and  $^{13}\text{C}$  NMR of 5-ketocamphor, respectively.

(A)

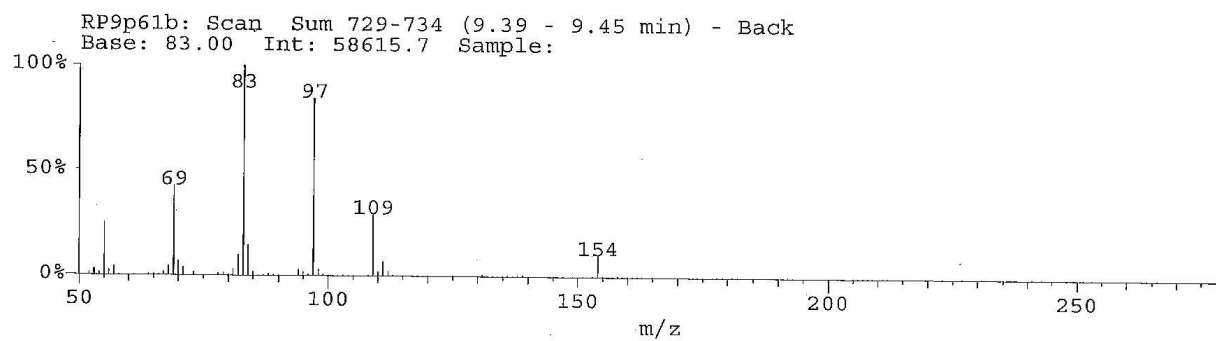

**Supporting Information Figure S2:** Mass spectroscopic analysis data for 5-D<sub>2</sub>-camphor with intact mass of 154 a.m.u. that matches the calculated mass.
